# Supplementary material
Source: Springer Nature journal article supplement (https://www.springermedizin.de/resource/supplementary/13023_2009_202_MOESM1_ESM.pdf/9641850)
Supplement: MOESM1 [file 9641850]

SJS

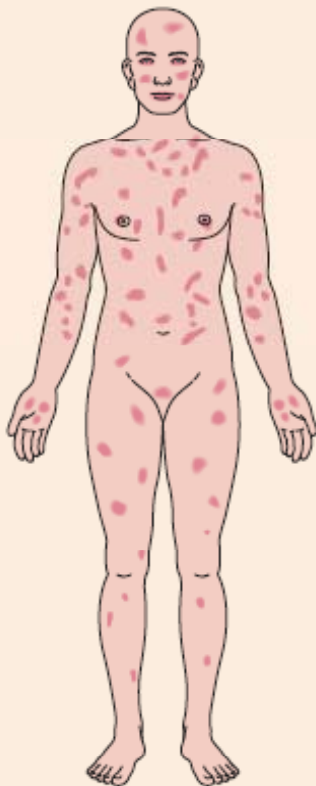

<10%

SJS-TEN  
overlap

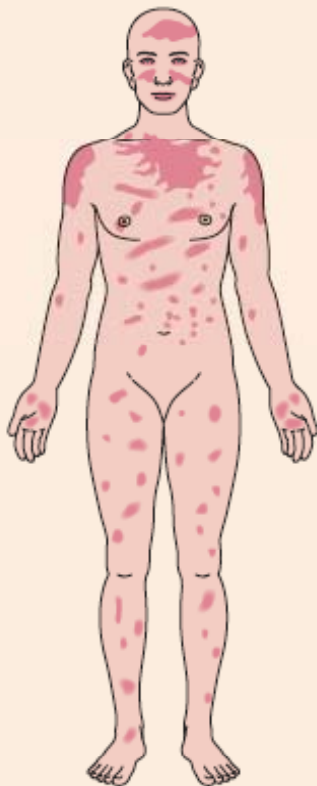

10-30%

TEN

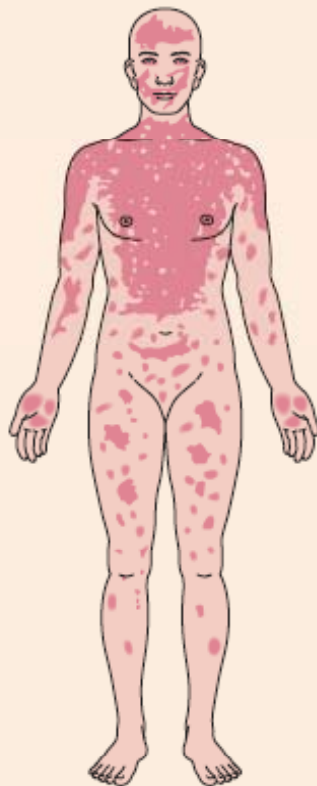

>30%

 = Surface area of epidermal detachment

 = detached epidermis

SJS - Stevens-Johnson syndrome    TEN - Toxic epidermal necrolysis
